# Supplementary material for: Carambola-like Bi2Te3 superstructures with enhanced photoabsorption for highly efficient photothermal therapy in the second near-infrared biowindow
Source: Royal Society of Chemistry journal article supplement (doi:10.1039/d1tb00694k), 2021-01-01
Supplement: d1tb00694k1.pdf [file d1tb00694k1.pdf]

## **Carambola-like $\text{Bi}_2\text{Te}_3$ superstructures with enhanced photoabsorption for highly efficient photothermal therapy in the second biowindow**

Ying Zhao,<sup>[a,b]</sup> Yang Liu,<sup>[a,b]</sup> Qishun Wang,<sup>[c]</sup> Jianhua Liu,<sup>[d]</sup> Songtao Zhang,<sup>[a]</sup> Tianqi Zhang,<sup>[d]</sup> Daguang Wang,<sup>[e]</sup> Yinghui Wang,<sup>\*,[a]</sup> Longhai Jin,<sup>\*,[d]</sup> and Hongjie Zhang<sup>\*,[a,b,c]</sup>

a. State Key Laboratory of Rare Earth Resource Utilization, Changchun Institute of Applied Chemistry (CIAC), Chinese Academy of Sciences, Changchun 130022, China.

b. University of Science and Technology of China, Hefei 230026, China.

c. Department of Chemistry, Tsinghua University, Beijing 100084, China.

d. The second hospital of Jilin University, Changchun 130041, China.

e. Department of Gastric and Colorectal Surgery, the First Hospital, Jilin University, Changchun, Changchun 130021, China.

E-mail: yhwang@ciac.ac.cn (Y. Wang), jinlonghai@jlu.edu.cn (L. Jin), hongjie@ciac.ac.cn (H. J. Zhang).

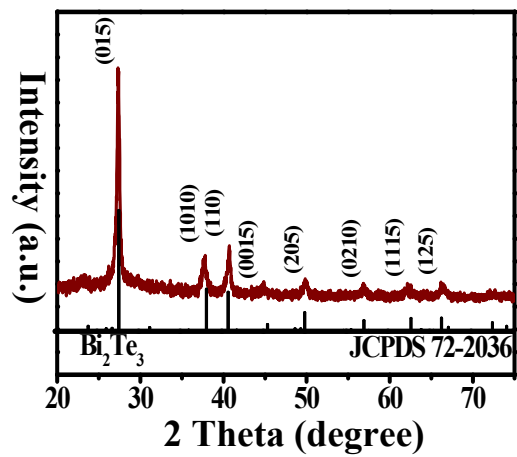

Fig. S1. XRD spectrum of Bi<sub>2</sub>Te<sub>3</sub>.

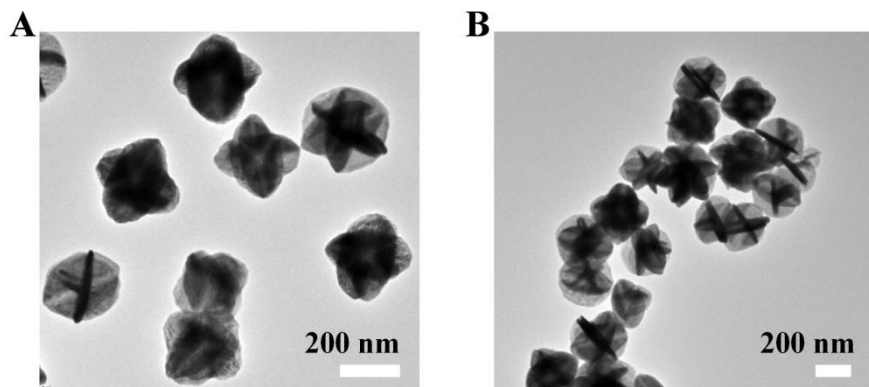

Fig. S2. TEM images of  $\text{Bi}_2\text{Te}_3@\text{PEG}$ .

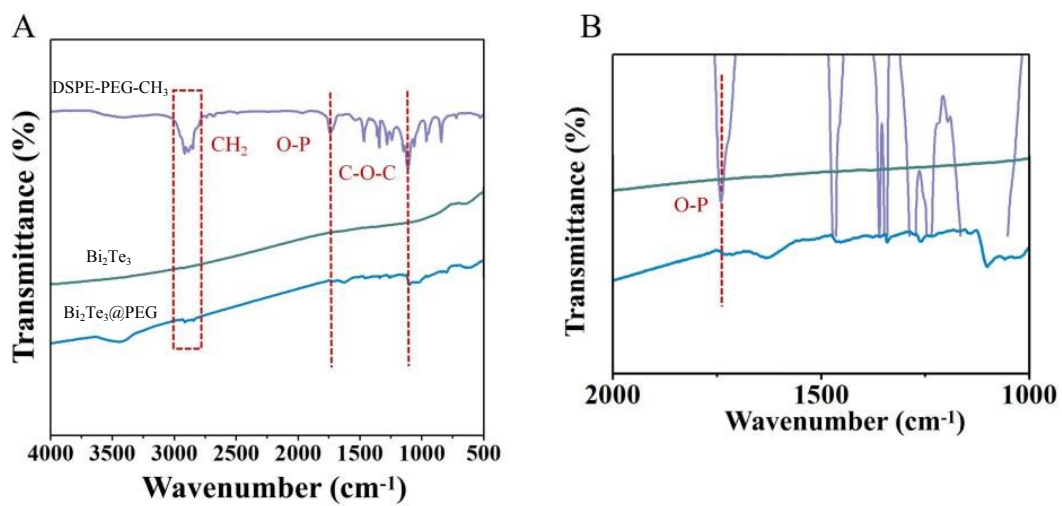

Fig. S3. (A) FT-IR spectra of DSPE-PEG-CH<sub>3</sub>, Bi<sub>2</sub>Te<sub>3</sub>, and Bi<sub>2</sub>Te<sub>3</sub>@PEG. (B) Partial enlargement of Fig. A (1000-2000 cm<sup>-1</sup>).

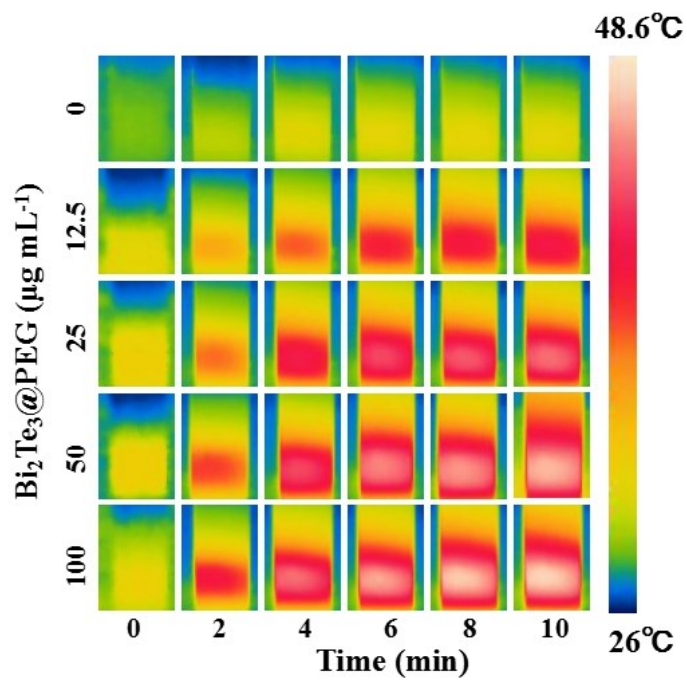

Fig. S4. Infrared thermal images of  $\text{Bi}_2\text{Te}_3@\text{PEG}$  aqueous solutions irradiated with an 1064 nm laser ( $1 \text{ W cm}^{-2}$ ) from 0 to 10 min at varied concentrations (0, 12.5, 25, 50, 100 ppm).

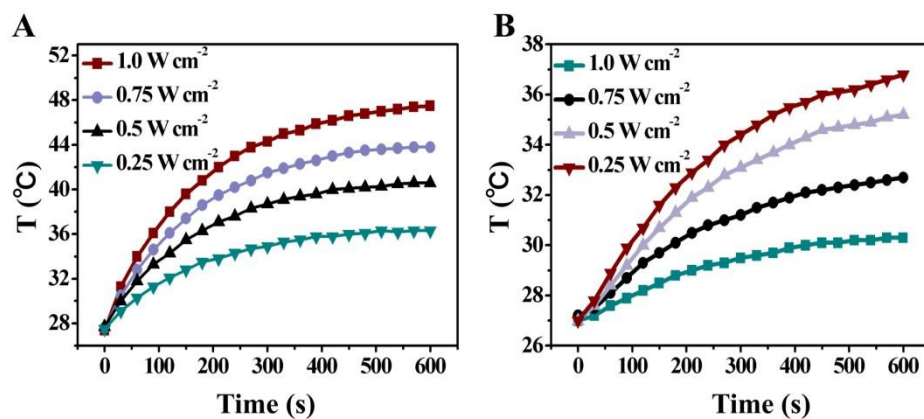

Fig. S5. (A) Temperature curves of Bi<sub>2</sub>Te<sub>3</sub>@PEG (100 ppm) under the irradiation of 1064 nm laser with different power density (1, 0.75, 0.5, 0.25 W cm<sup>-2</sup>). (B) Temperature curves of Bi<sub>2</sub>Te<sub>3</sub> nanoparticles (100 ppm) under the irradiation of 1064 nm laser with different power density (1, 0.75, 0.5, 0.25 W cm<sup>-2</sup>).

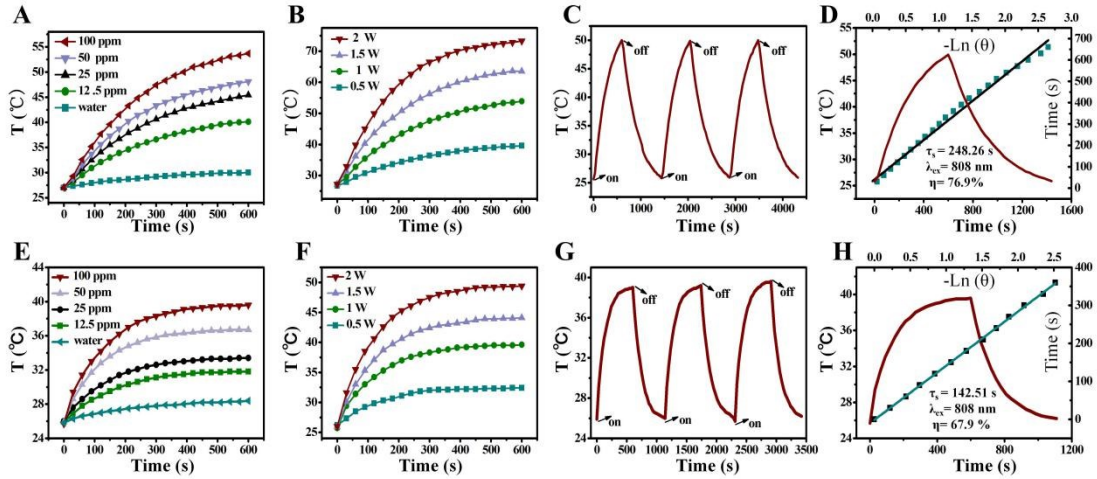

Fig. S6. (A) Temperature rise of  $\text{Bi}_2\text{Te}_3@\text{PEG}$  with different concentrations (0, 12.5, 25, 50, 100 ppm) under the irradiation of 808 nm laser ( $1 \text{ W cm}^{-2}$ ). (B) Temperature curves of  $\text{Bi}_2\text{Te}_3@\text{PEG}$  (100 ppm) under the irradiation of 808 nm laser with different power density (1, 0.75, 0.5, 0.25  $\text{W cm}^{-2}$ ). (C) Temperature of  $\text{Bi}_2\text{Te}_3@\text{PEG}$  over three on/off cycles of 808 nm laser. (D) Heating and cooling curves of  $\text{Bi}_2\text{Te}_3@\text{PEG}$ , linear time data acquired from the cooling period. (E) Temperature rise of  $\text{Bi}_2\text{Te}_3$  nanoparticles with different concentrations (0, 12.5, 25, 50, 100 ppm) under the irradiation of 808 nm laser ( $1 \text{ W cm}^{-2}$ ). (F) Temperature curves of  $\text{Bi}_2\text{Te}_3$  nanoparticles (100 ppm) under the irradiation of 808 nm laser with different power density (1, 0.75, 0.5, 0.25  $\text{W cm}^{-2}$ ). (G) Temperature of  $\text{Bi}_2\text{Te}_3$  nanoparticles over three on/off cycles of 808 nm laser. (H) Heating and cooling curves of  $\text{Bi}_2\text{Te}_3$  nanoparticles, linear time data acquired from the cooling period.

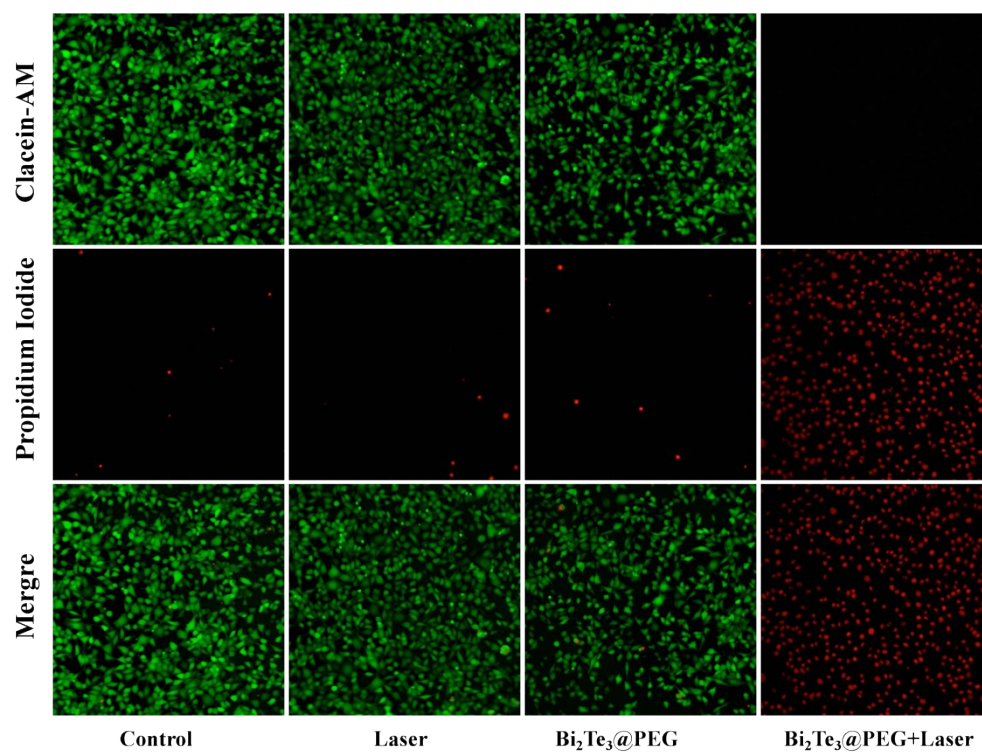

Fig. S7. Fluorescence images of L929 cells in different groups.



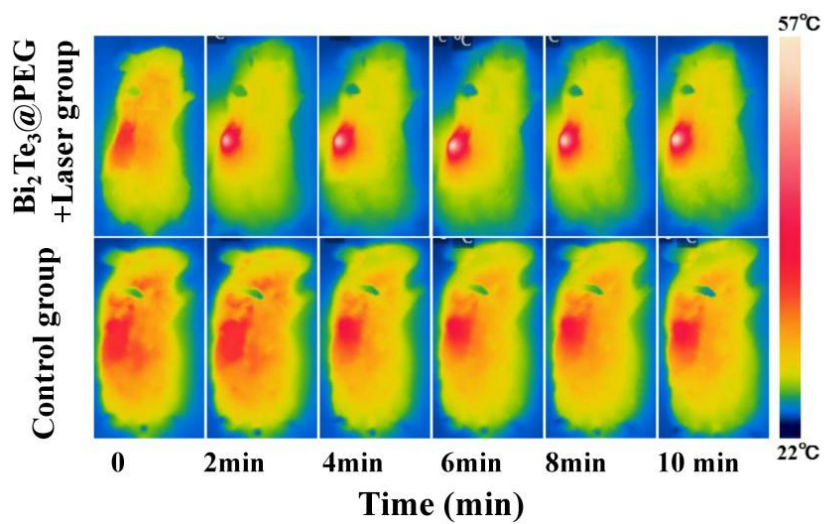

Fig. S8. In vivo thermal imaging of mice after treatment with (a) Bi<sub>2</sub>Te<sub>3</sub>@PEG + 1064 nm and (b) control (saline + 1064 nm).

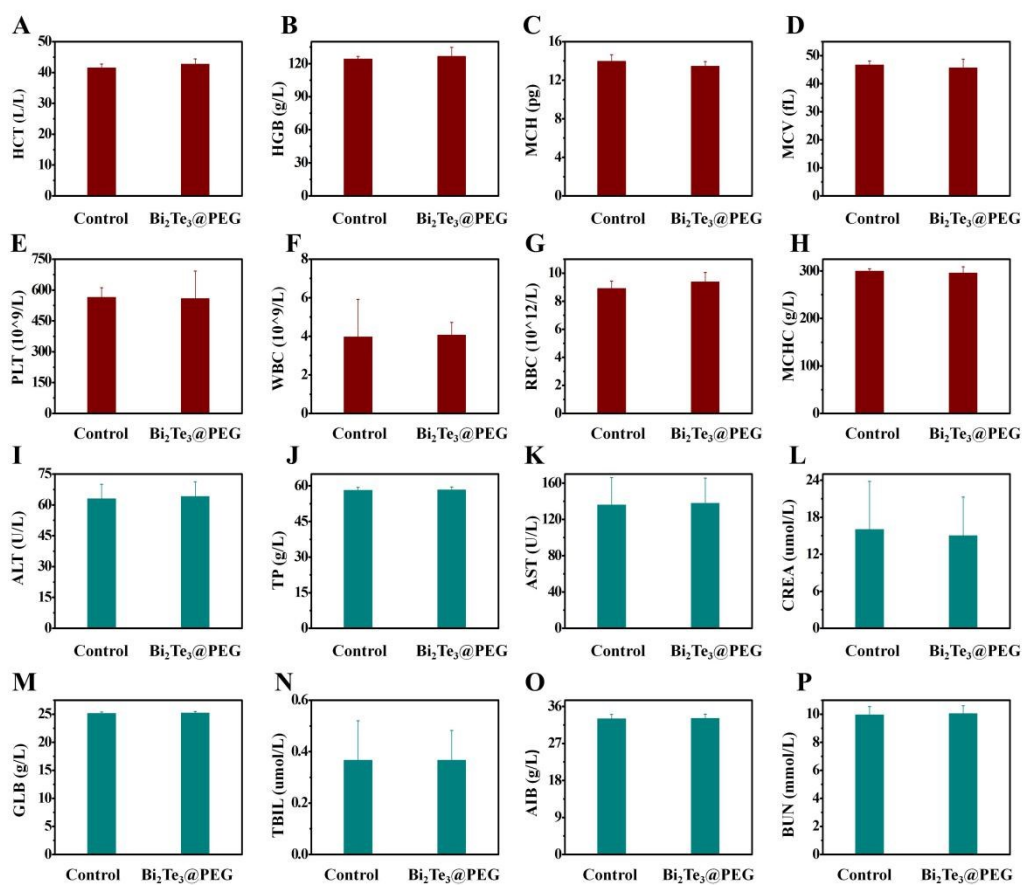

Fig. S9. (A-H) Hematological index and (I-P) biochemical blood analysis of the mice after intravenous injection of  $\text{Bi}_2\text{Te}_3@\text{PEG}$  at 30 d.
